# Supplementary material for: Design, synthesis and in vitro splicing inhibition of desmethyl and carba-derivatives of herboxidiene
Source: Royal Society of Chemistry journal article supplement (doi:10.1039/c6ob00725b), 2016-01-01
Supplement: c6ob00725b1.pdf [file c6ob00725b1.pdf]

Supplementary Material (ESI) for Organic and Biomolecular Chemistry

## Design, Synthesis and *in Vitro* Splicing Inhibition of Desmethyl and Carba-Derivatives of Herboxidiene

Arun K. Ghosh, Kai Lv, Nianchun Ma, Emilio L. Cárdenas, Kerstin A. Effenberger,  
Melissa S. Jurica

### Table of Contents

|                                                                             |        |
|-----------------------------------------------------------------------------|--------|
| General experimental conditions.....                                        | S1     |
| Experimental details for new compounds ( <b>22-27</b> ).....                | S2-S3  |
| Copies of <sup>1</sup> H and <sup>13</sup> C spectra of new compounds ..... | S4-S11 |

### Experimental Section

All reactions were carried out under an inert atmosphere, either N<sub>2</sub> or Ar, using magnetic stirring and oven-dried glassware. All solvents were anhydrous and distilled prior to use. Dichloromethane and triethylamine were distilled from calcium hydride. Tetrahydrofuran, diethyl ether, and benzene were distilled from sodium/benzophenone. All other solvents were HPLC grade or better. Flash column chromatography was performed using EM Science 60-200 mesh silica gel. Thin-layer chromatography was performed using 60 F-254 E. Merck silica gel plates. <sup>1</sup>H- and <sup>13</sup>C-NMR were recorded using Bruker AV-400 MHz, Avance DRX-500, Varian Mercury-Vx-300, and Gemini-2300 spectrometers and use Me<sub>4</sub>Si as an internal standard. Optical rotations were recorded on a Perkin-Elmer 341 polarimeter. A Thermo Finnigan LCQ Classic mass was used for MS analyses. The purity of test compounds was determined by HRMS and HPLC analysis. All test compounds showed ≥95% purity.

**(1R,3S)-3-acetylcyclohexane-1-carboxylic acid (22):** To a stirred solution of ZnBr<sub>2</sub> (877 mg, 3.8 mmol) in THF (10 mL) and Et<sub>2</sub>O (10 mL) was added dropwise a solution of MeMgBr in THF (1.3 mL, 3 M, 3.9 mmol) at 0 °C over 5 min under argon and left to stir at the same temperature. After 30 min, the mixture was stirred for 1 h at 23 °C, and stopped stirring, settled to precipitate for 1 h.

To a stirred solution of [Rh(nbd)Cl]<sub>2</sub> (13 mg, 0.028 mmol) and (*S*)-*tert*-butylphosphino-oxazoline (23 mg, 0.059 mmol) in THF (5 mL) in a separate flask was added the above pre-prepared methylzinc bromide solution (16 mL, decanted from the precipitate via syringe) and a solution of **18** (300 mg, 1.94 mmol) in THF (5 mL) at 0 °C. The mixture was stirred at 23 °C for 30 hrs, quenched by 1 M HCl (10 ml), diluted by H<sub>2</sub>O (15 mL), extracted by Et<sub>2</sub>O (3 × 20 mL), dried over anhydrous MgSO<sub>4</sub>, filtered and concentration. The residue was purified over silica gel chromatography (Hexane : Ethyl acetate = 2 : 1) to give compound **23** (160 mg, 48%, 91% ee) as a colorless oil. Chiral HPLC analysis was performed using a chiralcel OD-H column eluting with Hexane : *i*-PrOH = 99 : 1 0.5 mL/min. [ $\alpha$ ]<sup>20</sup><sub>D</sub> = -3.8 (c 1.00, CH<sub>2</sub>Cl<sub>2</sub>).

**Methyl 2-((1R,3S)-3-acetylcyclohexyl)acetate (24):** To a stirred solution of **23** (40 mg, 0.23 mmol) in THF (4 mL) was added Et<sub>3</sub>N (196  $\mu$ L, 1.4 mmol) and MsCl (54  $\mu$ L, 0.69 mmol) at 0 °C. The mixture was stirred at the same temperature for 30 min. A fresh prepared solution of CH<sub>2</sub>N<sub>2</sub> in Et<sub>2</sub>O (excess, 4 mL) was added to the mixture at 0 °C. The mixture was quenched by drops of acetic acid, diluted by H<sub>2</sub>O (5 mL), extracted by Et<sub>2</sub>O (3 × 10 mL), dried over anhydrous MgSO<sub>4</sub>, filtered and concentration. The residue was purified over silica gel chromatography (Hexane : Ethyl acetate : Et<sub>3</sub>N = 2 : 1 : 0.001) to give a colorless oil (35 mg, 78%) which should be used for the next step immediately.

To a stirred solution of above oil (35 mg, 0.18 mmol) in anhydrous MeOH was added a solution of silver benzoate (8.2 mg, 0.03 mmol) in dry Et<sub>3</sub>N (100  $\mu$ L, 0.71 mmol) at 23 °C under argon. The mixture was stirred for 1h and concentrated. The residue was purified over silica gel chromatography (Hexane : Ethyl acetate = 7 : 1) to give compound **24** (21 mg, 59%) as a colorless oil. [ $\alpha$ ]<sup>20</sup><sub>D</sub> = +8.3 (c 1.00, CH<sub>2</sub>Cl<sub>2</sub>); HRMS-ESI (m/z) calc. for C<sub>11</sub>H<sub>18</sub>NaO<sub>3</sub> [M + Na]<sup>+</sup> 221.1154, found 221.1147.

**Methyl 2-((1R,3S)-3-((E)-1-iodoprop-1-en-2-yl)cyclohexyl)acetate (25):** To a mixture of CrCl<sub>2</sub> (61 mg, 0.5 mmol) in THF (2 mL) was added dropwise the solution of the ketone **24** (10 mg, 0.05 mmol) and CHI<sub>3</sub> (59 mg, 0.15 mmol) in THF (2 mL). After being stirred at 23 °C under argon for 4 h, the mixture was quenched by water and extracted with EtOAc. The combined organic phase was washed with water, brine, dried over anhydrous Mg<sub>2</sub>SO<sub>4</sub> and concentrated. The residue was purified column chromatography (hexane/EtOAc, 40:1) to give the vinyl iodide **25** (7 mg, 44%) as colorless oil which should be used for the next step immediately.

**Methyl 2-((1R,3S)-3-((2E,4E,6S,8E,10S,11R,12R)-12-hydroxy-11-methoxy-6,8,10-trimethyltrideca-2,4,8-trien-2-yl)cyclohexyl)acetate (26):** A mixture of vinyl iodide **25** (12 mg, 0.037 mmol), boronate **7** (16 mg, 0.034 mmol), Pd(PPh<sub>3</sub>)<sub>4</sub> (3 mg, 0.002 mmol) and Cs<sub>2</sub>CO<sub>3</sub> (220 mg, 0.67 mmol) in THF (2 mL) was stirred at 55 °C under argon for 4 h. It was quenched with water, and then extracted with ether. The combined organic phase was washed with water, brine, dried (Na<sub>2</sub>SO<sub>4</sub>) and concentrated. The residue was purified column chromatography (hexane/EtOAc, 30:1) to give a colorless oil (13 mg, 72%).

To a solution of above oil (10 mg, 0.023 mmol) in THF (2 mL) was added 1N HCl in MeOH (0.2 mL) at 23 °C. The mixture was stirred for 1 h at the same temperature, and concentrated. The residue was purified column chromatography (hexane : EtOAc = 4 : 1) to give the de-protected product **26** (6.8 mg, 87%) as a colorless oil. [ $\alpha$ ]<sub>D</sub><sup>20</sup> = -19.2 (c 0.25, CH<sub>2</sub>Cl<sub>2</sub>); <sup>1</sup>H NMR (500 MHz, CDCl<sub>3</sub>) 6.18 (dd, *J* = 10.9, 15.1 Hz, 1H), 5.76 (d, *J* = 10.7 Hz, 1H), 5.46 (dd, *J* = 7.5, 15.1 Hz), 4.96 (d, *J* = 9.5 Hz, 1H), 3.70 (brs, 1H), 3.65 (s, 3H), 3.50 (s, 3H), 2.70 (dd, *J* = 4.0, 6.8 Hz, 1H), 2.74-2.60 (m, 1H), 2.37 (t, *J* = 7.0 Hz, 1H), 2.20 (dd, *J* = 3.1, 7.2 Hz, 2H), 2.01 (dd, *J* = 6.9, 13.4 Hz, 1H), 1.95-1.70 (m, 4H), 1.69 (s, 3H), 1.60 (d, *J* = 3 Hz, 3H), 1.35-1.24 (m, 3H), 1.19 (d, *J* = 6.5 Hz, 3H), 0.95 (d, *J* = 6.8 Hz, 3H), 0.93 (d, *J* = 7.1 Hz, 3H); <sup>13</sup>C NMR (100 MHz, CDCl<sub>3</sub>) 173.3, 140.8, 138.1, 133.6, 129.4, 124.5, 122.9, 89.6, 67.8, 61.3, 51.3, 47.5, 46.8, 41.9, 37.8, 34.9, 34.7, 34.6, 32.5, 30.9, 25.8, 20.3, 19.9, 16.4, 16.2, 14.7; HRMS-ESI (*m/z*) calc. for C<sub>26</sub>H<sub>44</sub>NaO<sub>4</sub> [M + Na]<sup>+</sup> 443.3137, found 443.3117.

**2-((1R,3S)-3-((S,2E,4E)-7-((2R,3R)-3-((2R,3R,4R)-4-hydroxy-3-methoxypentan-2-yl)-2-methyloxiran-2-yl)-6-methylhepta-2,4-dien-2-yl)cyclohexyl) acetic acid (27):** To a solution of the **26** (7 mg, 0.016 mmol) and VO(acac)<sub>2</sub> (0.88 mg, 0.003 mmol) in CH<sub>2</sub>Cl<sub>2</sub> (1 mL) was added *t*-BuOOH (5.5 M in decane, 13.3  $\mu$ L, 0.07 mmol) at -78 °C. After being stirred at -15– -20 °C for 48 h, it was quenched with Me<sub>2</sub>S and stirred at 23 °C for 30 min. It was concentrated and used for next reaction directly. To a solution of the above crude product in MeOH (1 mL) and water (0.2 mL) was added K<sub>2</sub>CO<sub>3</sub> (14.7 mg, 0.11 mmol). After being refluxed for 2 h, it was cooled, treated with aq. NaHSO<sub>4</sub> (0.01 M, 50 mL) and extracted with EtOAc. The combined organic phase was washed with brine, dried (Na<sub>2</sub>SO<sub>4</sub>) and concentrated. The residue was purified by column chromatography (CH<sub>2</sub>Cl<sub>2</sub> : MeOH = 15 : 1) to give the acid **27** (2.8 mg, 40% for 2 steps) as a semi solid. [ $\alpha$ ]<sub>D</sub><sup>20</sup> = -15.0 (c 0.10, CH<sub>2</sub>Cl<sub>2</sub>); <sup>1</sup>H NMR (500 MHz, CD<sub>3</sub>OD) 6.24 (dd, *J* = 10.5, 15.0 Hz, 1H), 5.74 (d, *J* = 11.0 Hz, 1H), 5.33 (dd, *J* = 9.0, 14.5 Hz, 1H), 3.77 (t, *J* = 6.4 Hz, 1H), 3.51 (s, 3H), 2.96 (dd, *J* = 4.0, 6.4 Hz, 1H), 2.62 (d, *J* = 9.4 Hz, 1H), 2.40 (brs, 1H), 2.15 (t, *J* = 6.5 Hz, 1H), 1.95-1.88 (m, 2H), 1.80-1.73 (m, 3H), 1.67 (s, 3H), 1.47-1.44 (m, 1H), 1.40-1.30 (m, 1H), 1.17-1.10 (m, 2H), 1.08 (d, *J* = 6.8 Hz, 3H), 1.01 (d, *J* = 6.6 Hz, 1H), 0.95-0.87 (m, 2H), 0.80 (d, *J* = 6.8 Hz, 1H); <sup>13</sup>C NMR (100 MHz, CD<sub>3</sub>OD) 175.4, 140.7, 136.6, 125.7, 122.8, 86.9, 68.4, 66.4, 61.2, 60.3, 41.6, 37.7, 34.9, 34.8, 34.7, 32.2, 30.8, 25.6, 21.1, 18.2, 15.2, 13.4, 9.6; HRMS-ESI (*m/z*) calc. for C<sub>25</sub>H<sub>42</sub>NaO<sub>5</sub> [M + Na]<sup>+</sup> 445.2930, found 445.2913.

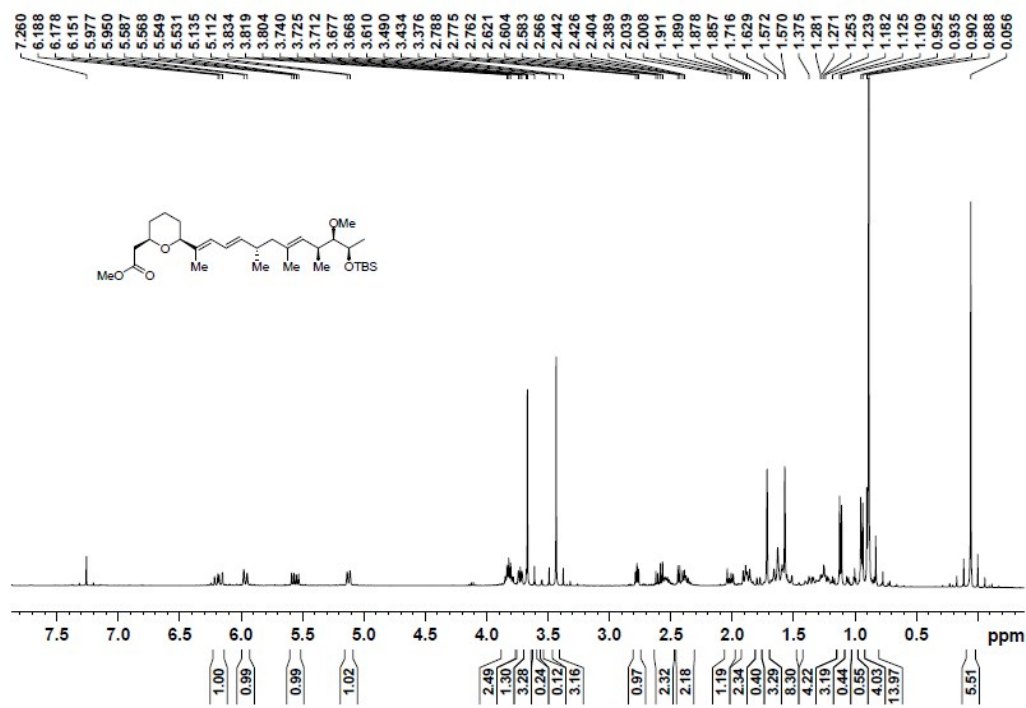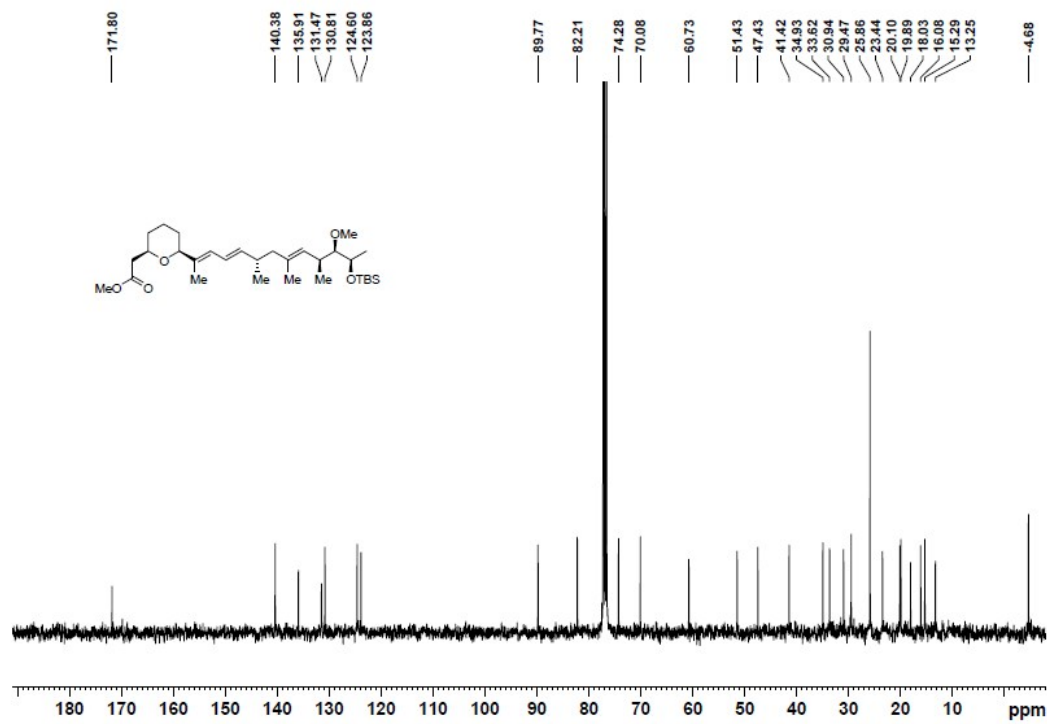

NMR Spectra for compound 17

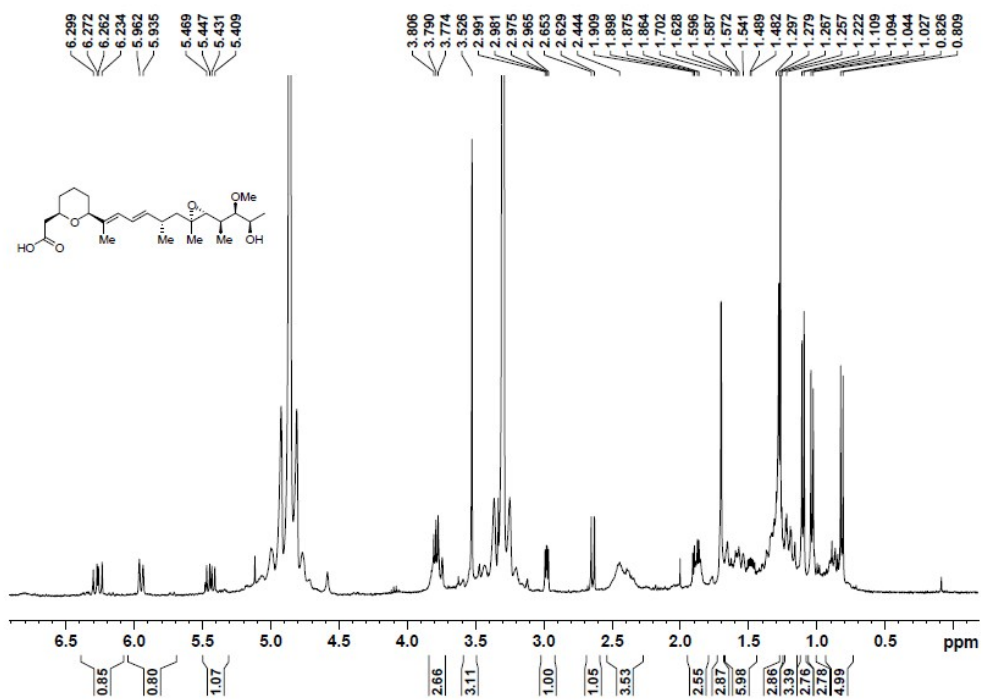

NMR Spectra for compound 5

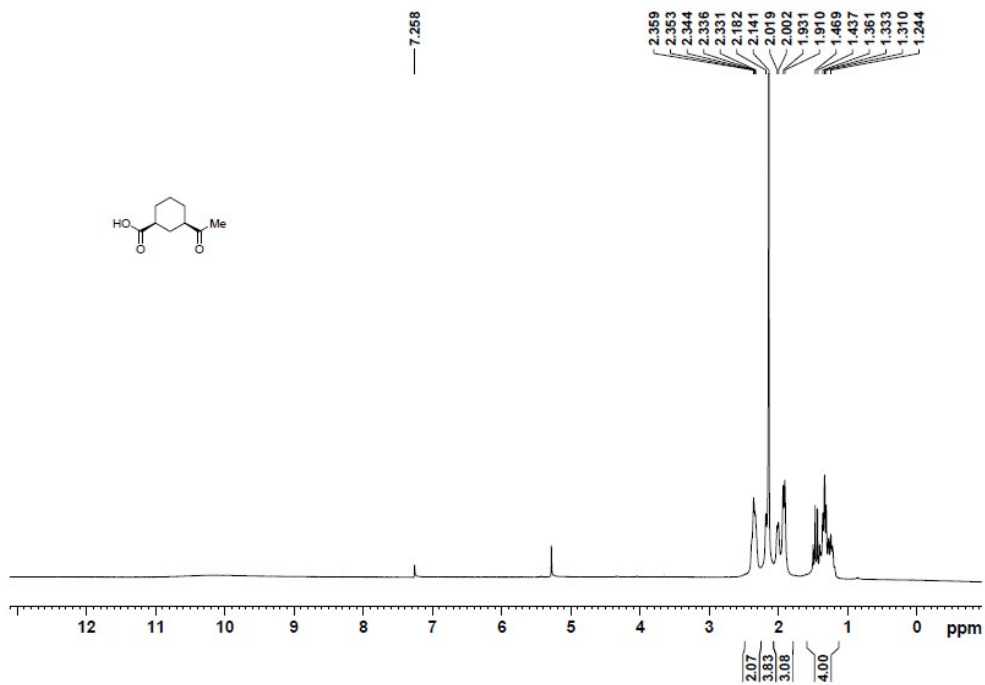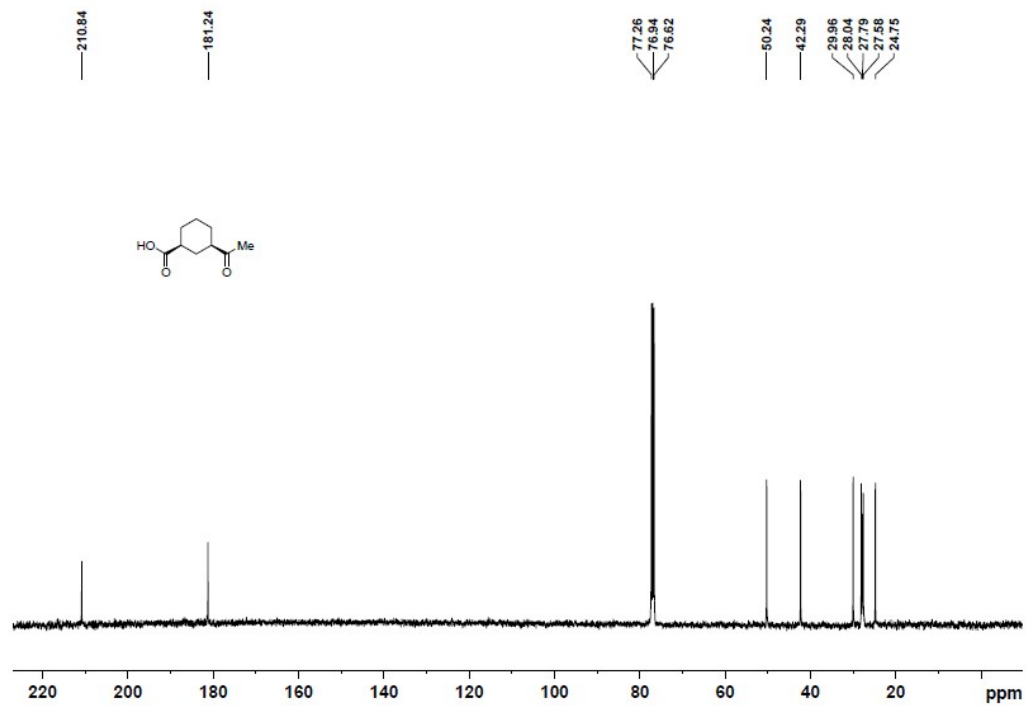

NMR Spectra for compound 19

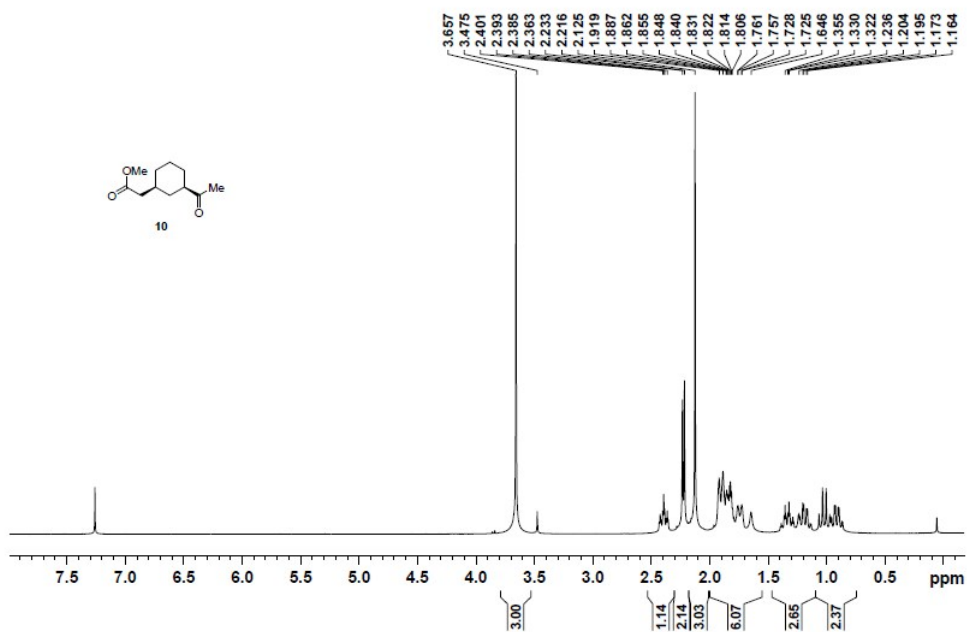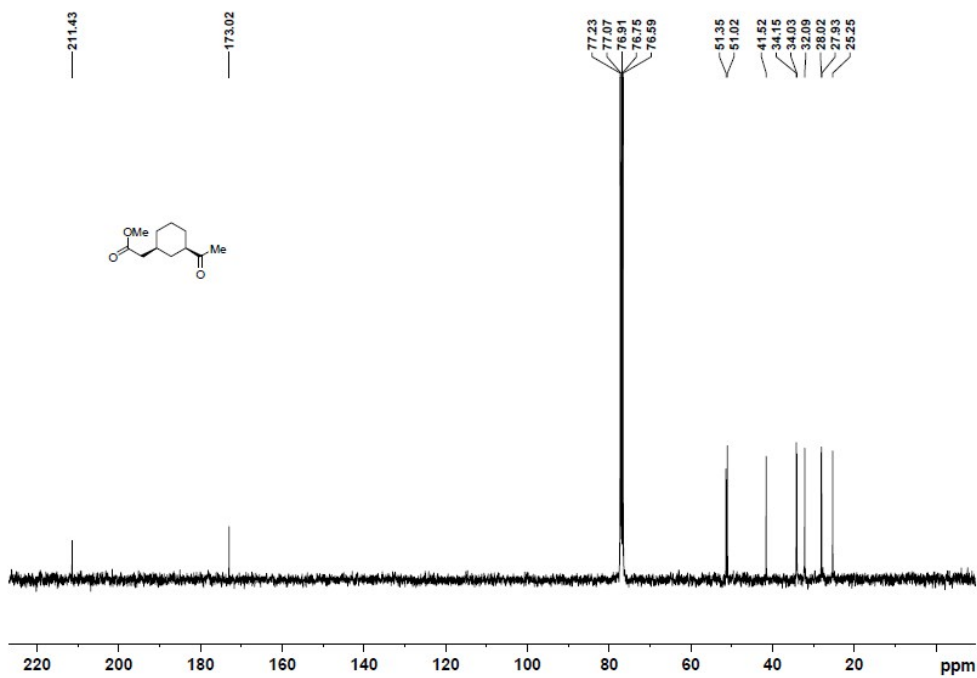

NMR Spectra for compound 21

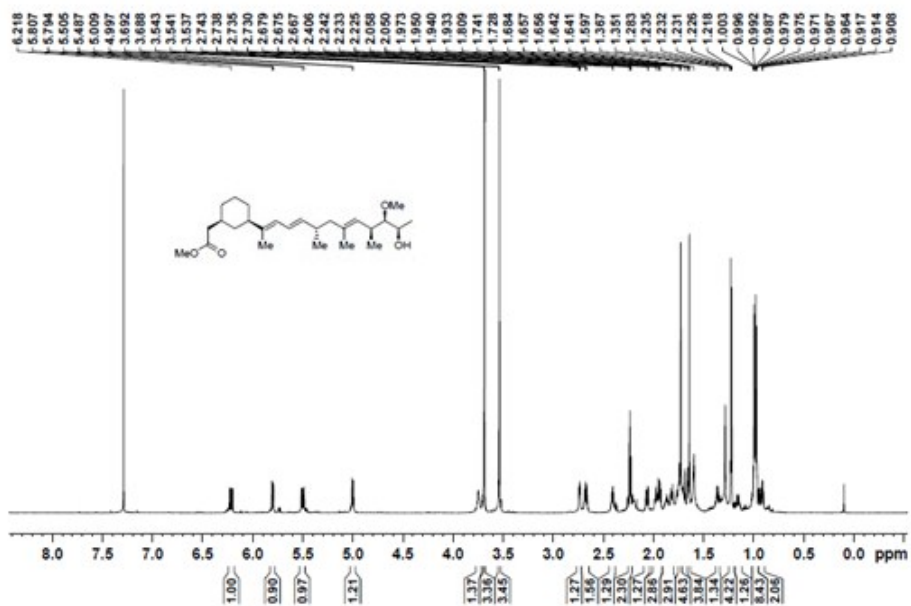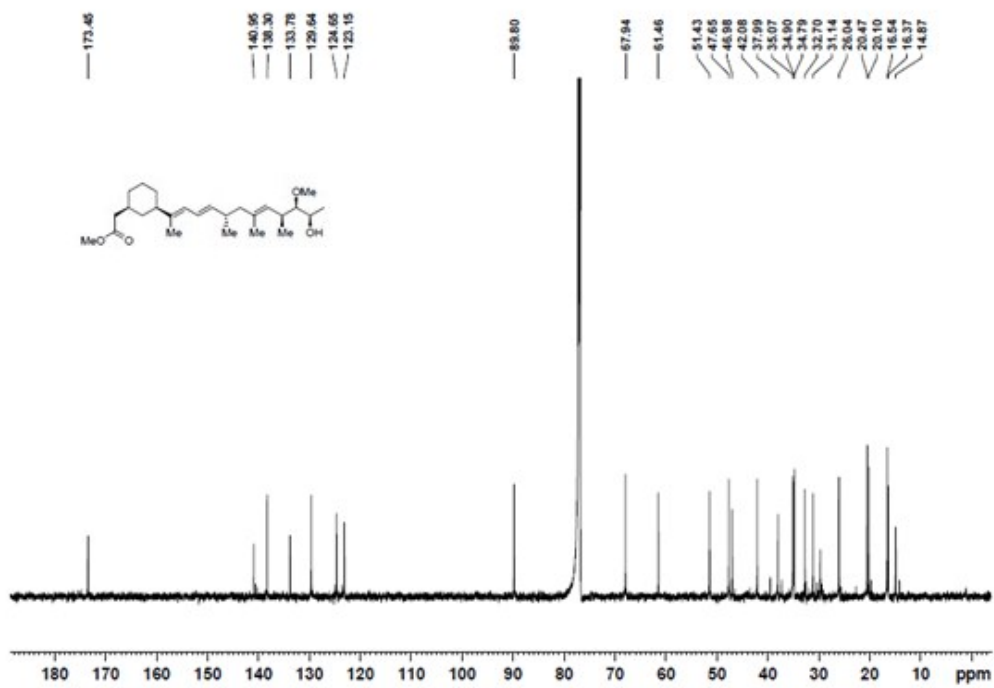

NMR Spectra for compound 22



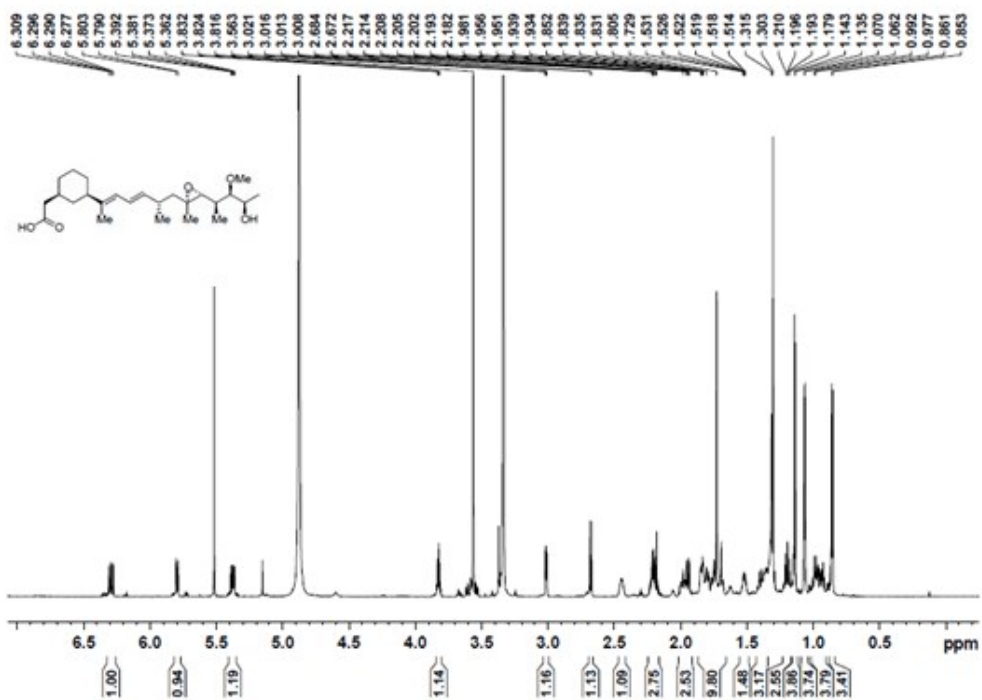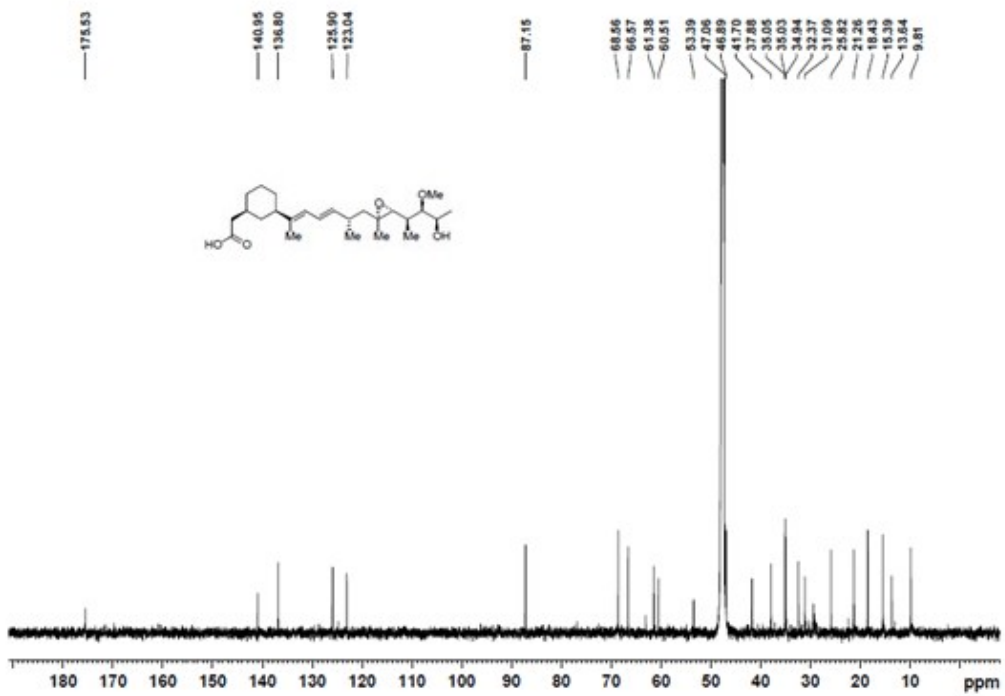

NMR Spectra for compound 6

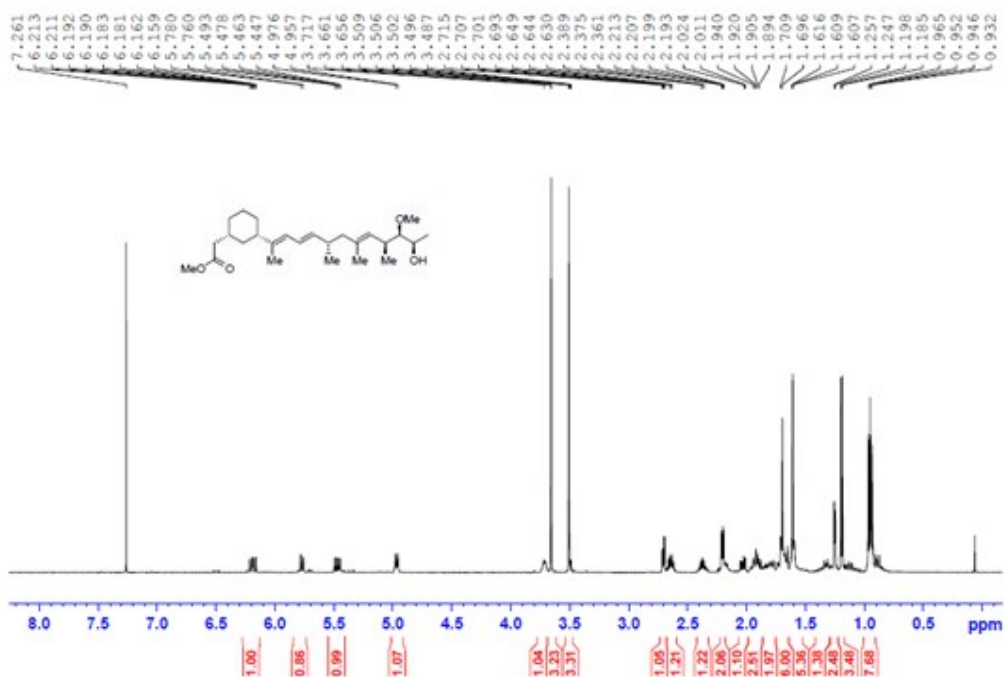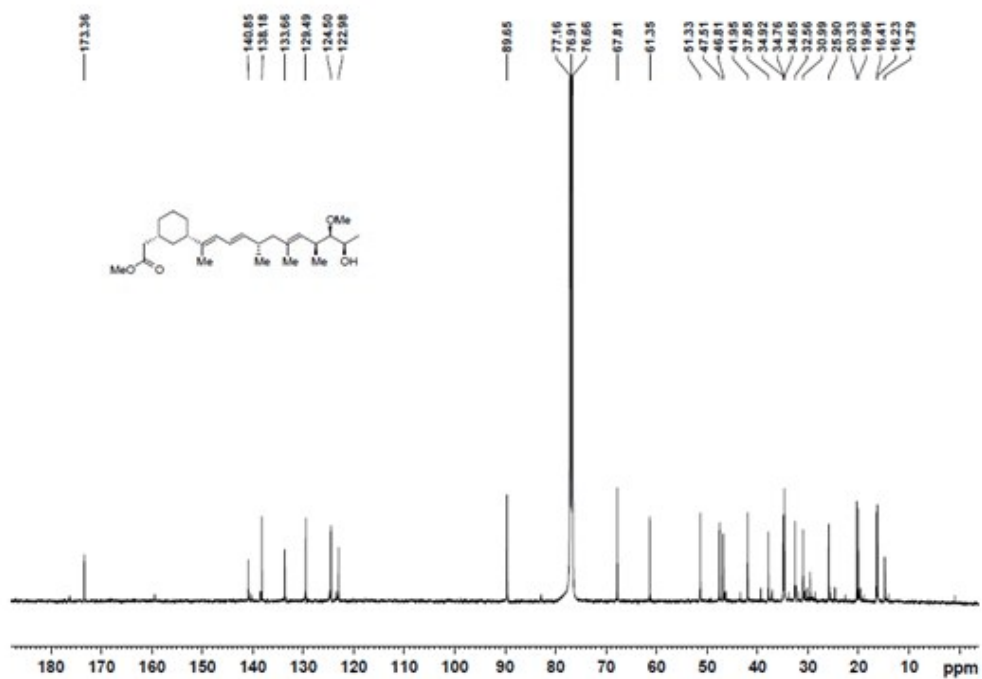

NMR Spectra for compound 26

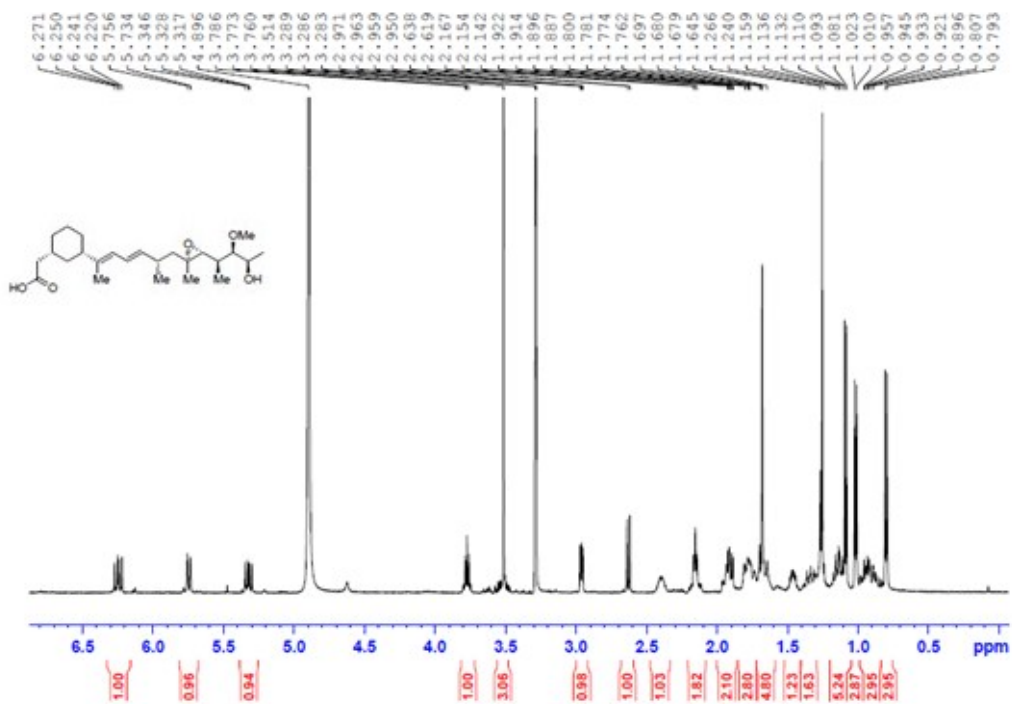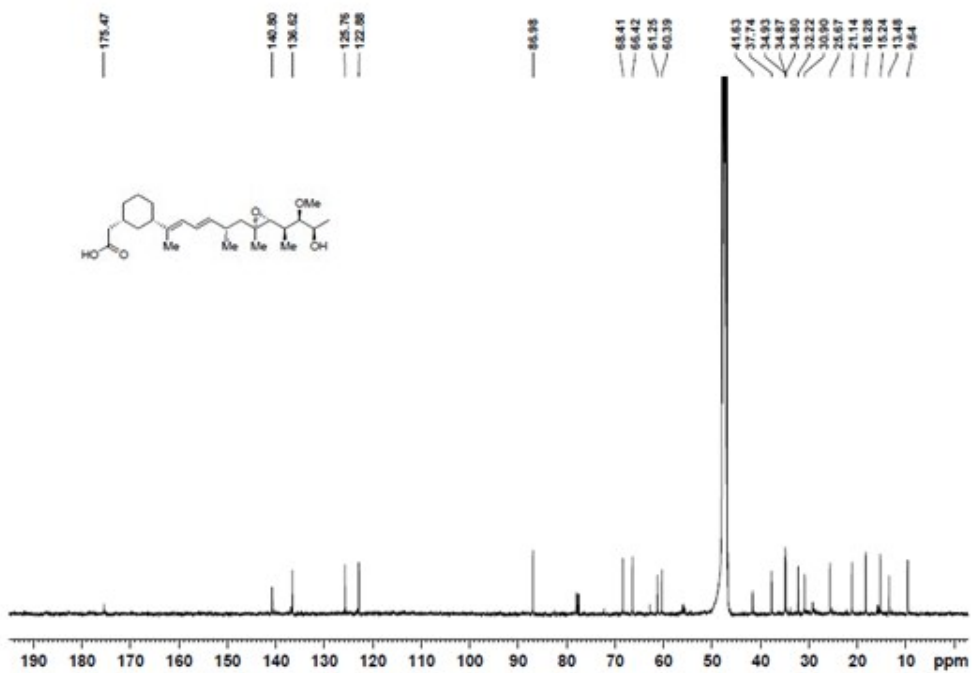

NMR Spectra for compound 27
